# Supplementary material for: Effect of functionalized multiwalled carbon nanotubes on the mechanical, swelling and viscoelastic properties of gum ghatti-cl-poly(NIPAm) hydrogels
Source: Royal Society of Chemistry journal article supplement (doi:10.1039/d4nj01677g), 2024-01-01
Supplement: d4nj01677g1.pdf [file d4nj01677g1.pdf]

## Effect of Functionalized Multiwalled Carbon Nanotubes on Mechanical, Swelling and Viscoelastic Properties on Gum ghatti-*cl*-poly(NIPAm) Hydrogels

Pragnesh N Dave<sup>1\*</sup> and Pradip M. Macwan<sup>2</sup>

<sup>1</sup> Department of Chemistry, Sardar Patel University, Vallabh Vidyangar-388 120, Gujarat, India

<sup>2</sup> B. N. Patel Institute of Paramedical & Science (Science Division), Sardar Patel Education Trust, Bhalej Road, Anand - 388001, Gujarat, India.

\*Corresponding author: pragnesh7@yahoo.com

### Supplementary information

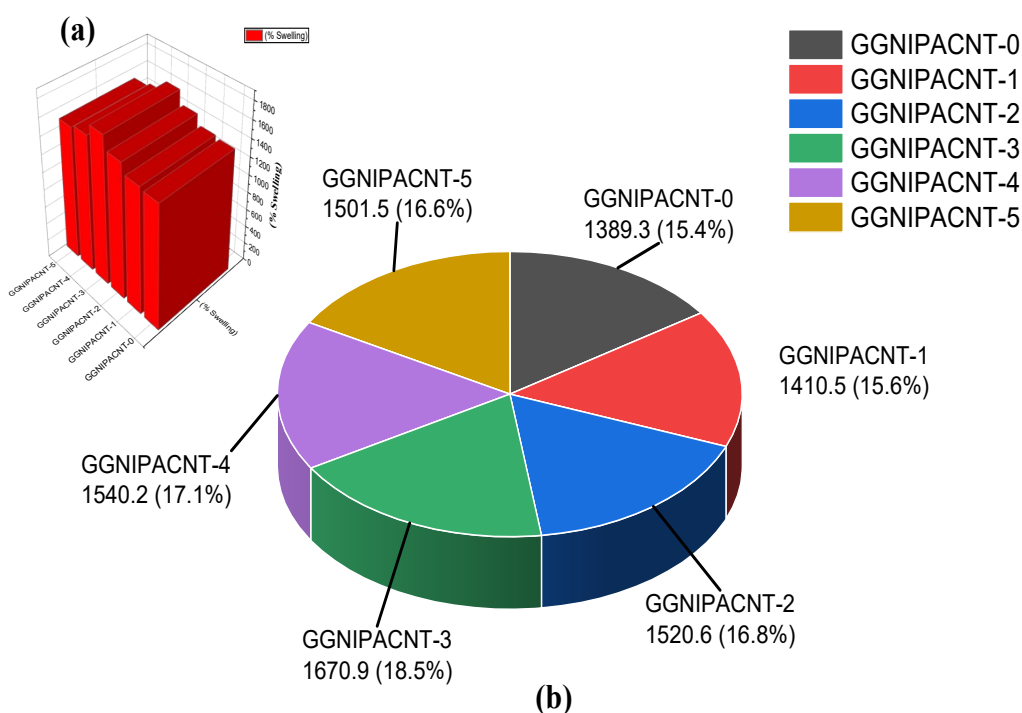

**Figure S1** Percentage swelling of Gum ghatti-*cl*-poly(NIPAm)-*o*-MWCNT hydrogels.

**Table S1.** Effect of *-o*-MWCNT concentration on the viscosity of GGNIPACNT hydrogels at different shear rates.

| <i>-o</i> -MWCNT conc.<br>(mg) | Viscosity at Shear rate (1/s) |      |      |      |
|--------------------------------|-------------------------------|------|------|------|
|                                | 0.1                           | 1    | 10   | 100  |
| 0                              | 142                           | 27.4 | 5.12 | 1.31 |
| 10                             | 85.7                          | 41.4 | 7.51 | 1.8  |
| 20                             | 324                           | 60.1 | 12   | 3.53 |
| 30                             | 324                           | 60.1 | 12   | 3.53 |
| 40                             | 341                           | 56.4 | 9.62 | 2.66 |
| 50                             | 83.5                          | 36.8 | 7.2  | 1.7  |

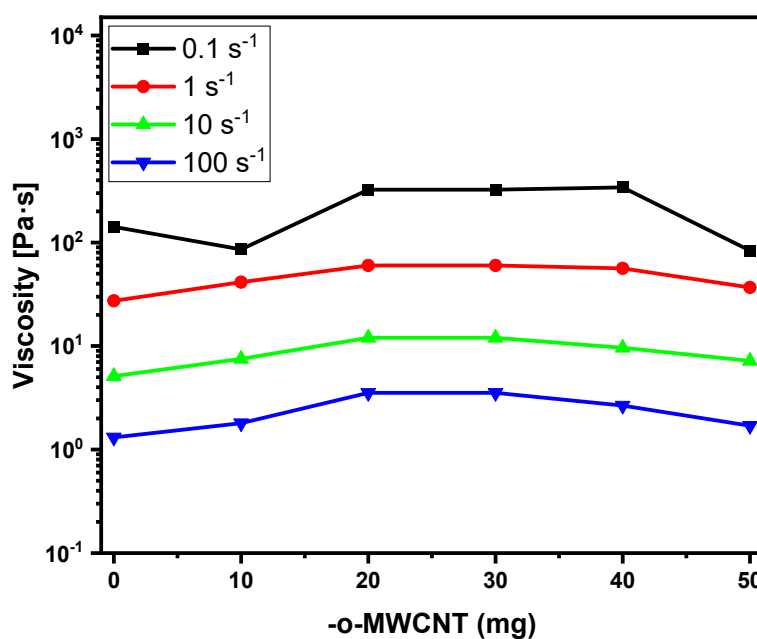

**Figure S2.** Viscosity versus *-o*-MWCNT concentration on shear rate.

**Table S2.** The values of storage modulus, loss modulus, complex viscosity and damping factor with angular frequency at 0.1, 1, 10 and 100 (rad/s)

| Hydrogels   | Angular Frequency (rad/s) |      |              |          |      |      |              |          |      |      |              |          |      |      |              |          |
|-------------|---------------------------|------|--------------|----------|------|------|--------------|----------|------|------|--------------|----------|------|------|--------------|----------|
|             | 0.1                       |      |              |          | 1    |      |              |          | 10   |      |              |          | 100  |      |              |          |
|             | G'                        | G''  | tan $\delta$ | $\eta^*$ | G'   | G''  | tan $\delta$ | $\eta^*$ | G'   | G''  | tan $\delta$ | $\eta^*$ | G'   | G''  | tan $\delta$ | $\eta^*$ |
| GGNIPACNT-0 | 35.8                      | 6.19 | 0.173        | 364      | 41.7 | 6.27 | 0.15         | 42.2     | 51.3 | 11.1 | 0.217        | 5.25     | 62.4 | 24.2 | 0.387        | 0.669    |
| GGNIPACNT-1 | 151                       | 19.5 | 0.129        | 1520     | 159  | 23.5 | 0.148        | 161      | 195  | 34.4 | 0.177        | 19.8     | 243  | 53.4 | 0.22         | 2.48     |
| GGNIPACNT-2 | 3110                      | 1390 | 0.447        | 34000    | 309  | 37.6 | 0.122        | 311      | 355  | 50.4 | 0.142        | 35.9     | 514  | 85.6 | 0.167        | 5.21     |
| GGNIPACNT-3 | 27500                     | 7210 | 0.262        | 284000   | 4830 | 1380 | 0.287        | 5030     | 4810 | 1360 | 0.282        | 499      | 5880 | 1690 | 0.287        | 61.2     |
| GGNIPACNT-4 | 159                       | 23.5 | 0.148        | 1610     | 153  | 18   | 0.118        | 154      | 177  | 25.4 | 0.144        | 17.9     | 297  | 48.2 | 0.162        | 3.01     |
| GGNIPACNT-5 | 247                       | 76.7 | 0.31         | 2590     | 138  | 21.1 | 0.152        | 140      | 161  | 26.6 | 0.166        | 16.3     | 226  | 33.6 | 0.149        | 2.28     |

**Table S3** Storage and loss moduli values of GGNIPACNT-0 to GGNIPACNT-5 at the temperatures 40°C and 60 °C for heating.

| Hydrogels   | Temperature 40 °C |      | Temperature 60 °C |      |
|-------------|-------------------|------|-------------------|------|
|             | G'                | G''  | G'                | G''  |
| GGNIPACNT-0 | 174               | 31.3 | 294               | 92   |
| GGNIPACNT-1 | 121               | 34.4 | 129               | 34.8 |
| GGNIPACNT-2 | 77                | 16.1 | 83.7              | 18.5 |
| GGNIPACNT-3 | 87.4              | 16.3 | 191               | 52.1 |
| GGNIPACNT-4 | 204               | 34.8 | 237               | 37.9 |
| GGNIPACNT-5 | 146               | 25.1 | 172               | 28   |

**Table S4** Storage and loss moduli values of GGNIPACNT-0 to GGNIPACNT-5 at the temperatures 40°C and 60 °C for cooling.

| Hydrogels   | Temperature 40 °C |       | Temperature 60 °C |       |
|-------------|-------------------|-------|-------------------|-------|
|             | G'                | G''   | G'                | G''   |
| GGNIPACNT-0 | 180               | 204   | 205               | 310   |
| GGNIPACNT-1 | 4740              | 1410  | 3170              | 960   |
| GGNIPACNT-2 | 61600             | 15300 | 45400             | 13700 |
| GGNIPACNT-3 | 50900             | 10900 | 66500             | 15400 |
| GGNIPACNT-4 | 12700             | 4380  | 11600             | 4260  |
| GGNIPACNT-5 | 25700             | 6570  | 29100             | 8000  |

**Table S5.** The value of elastic and viscous moduli and  $\tan\delta$  at 1, 10, 25 and 99.8 % of strain of GGNIPACNT-0 to GGNIPACNT-5.

| Hydrogels   | 1 % strain |      |              | 10 % strain |      |              | 25 % strain |      |              | 99.8 % strain |      |              |
|-------------|------------|------|--------------|-------------|------|--------------|-------------|------|--------------|---------------|------|--------------|
|             | G'         | G''  | $\tan\delta$ | G'          | G''  | $\tan\delta$ | G'          | G''  | $\tan\delta$ | G'            | G''  | $\tan\delta$ |
| GGNIPACNT-0 | 62.1       | 14.1 | 0.227        | 45.5        | 15.4 | 0.339        | 34.2        | 17.4 | 0.511        | 14.6          | 16.5 | 1.12         |
| GGNIPACNT-1 | 181        | 32.8 | 0.181        | 155         | 41.1 | 0.265        | 112         | 53.4 | 0.478        | 31.5          | 42.6 | 1.35         |
| GGNIPACNT-2 | 190        | 25.7 | 0.135        | 158         | 36.5 | 0.231        | 120         | 48.6 | 0.404        | 44.4          | 49.6 | 1.12         |
| GGNIPACNT-3 | 288        | 42.7 | 0.149        | 236         | 62.9 | 0.267        | 166         | 85.1 | 0.512        | 46.8          | 64.3 | 1.38         |
| GGNIPACNT-4 | 205        | 34.6 | 0.169        | 169         | 45.7 | 0.271        | 116         | 59.3 | 0.512        | 30.7          | 41.7 | 1.36         |
| GGNIPACNT-5 | 175        | 22.4 | 0.129        | 151         | 29.7 | 0.197        | 112         | 46.2 | 0.411        | 34.9          | 46.7 | 1.34         |

**Table S6** The value of shear stress (pa) at 0.1, 10, 25.1 and 99.8 % of strain of GGNIPACNT-0- GGNIPACNT-5.

| Hydrogels   | 0.1 %  | 1 %   | 10 % | 25.1 % | 99.8 % |
|-------------|--------|-------|------|--------|--------|
| GGNIPACNT-0 | 0.0668 | 0.634 | 4.78 | 9.6    | 22     |
| GGNIPACNT-1 | 0.18   | 1.84  | 16   | 31     | 52.9   |
| GGNIPACNT-2 | 0.193  | 1.91  | 16.2 | 32.5   | 66.4   |
| GGNIPACNT-3 | 0.289  | 2.9   | 24.3 | 46.8   | 79.5   |
| GGNIPACNT-4 | 0.205  | 2.07  | 17.5 | 32.6   | 51.7   |
| GGNIPACNT-5 | 0.177  | 1.76  | 15.3 | 30.4   | 58.2   |
